# **How prior knowledge prepares perception: Prestimulus oscillations carry perceptual expectations and influence early visual responses.**

Abbreviated title: Knowledge impacts early perceptual processing

Jason Samaha<sup>1</sup>, Bastien Boutronnet<sup>2</sup>, and Gary Lupyan<sup>1</sup>

<sup>1</sup>Department of Psychology, University of Wisconsin-Madison, Madison, USA, 53703

<sup>2</sup>Leiden Centre for Research in Linguistics and the Leiden Centre for Brain and Cognition,  
Leiden University, Leiden, Netherlands, 2300 RC

Corresponding Author

Jason Samaha: [jsamaha@wisc.edu](mailto:jsamaha@wisc.edu)

Orcid ID: 0000-0001-8010-5993

1202 W Johnson St  
Madison, WI 53706  
(608) 265-3888

The authors declare no conflicts of interest.

This project was supported by NSF-PAC 1331293 to G.L. and by MH095984 to Bradley R. Postle

Author contributions: J.S. formulated hypotheses, collected and analyzed electrophysiological data, and wrote the manuscript. B.B. designed the experiments, collected the data, analyzed the behavioral data, and wrote the manuscript. G.L. conceptualized the experiments, analyzed the data, and wrote the manuscript.

## Abstract

Perceptual experience results from a complex interplay of bottom-up input and prior knowledge about the world, yet the extent to which knowledge affects perception, the neural mechanisms underlying these effects, and the stages of processing at which these two sources of information converge, are still unclear. In a series of experiments we show that language, in the form of verbal cues, both aids recognition of ambiguous “Mooney” images and improves objective visual discrimination performance. We then used electroencephalography (EEG) to better understand the mechanisms of this effect. The improved discrimination of images previously labeled was accompanied by a larger occipital-parietal P1 evoked response to the meaningful versus meaningless target stimuli. Time-frequency analysis of the interval between the two stimuli (just prior to the target stimulus) revealed increases in the power of posterior alpha-band (8-14 Hz) oscillations when the meaning of the stimuli to be compared was trained. The magnitude of the prestimulus alpha difference and the P1 amplitude difference was positively correlated across individuals. These results suggest that prior knowledge prepares the brain for upcoming perception via the modulation of prestimulus alpha-band oscillations, and that this preparatory state influences early (~120 ms) stages of visual processing.

## Introduction

A chief function of visual perception is to “provide a description that is useful to the viewer”<sup>1</sup>, that is, to construct meaning<sup>2,3</sup>. Canonical models of visual perception explain this ability as a feed-forward process, whereby low-level sensory signals are progressively combine into more complex descriptions that are the basis for recognition and categorization<sup>4,5</sup>. There is now considerable evidence, however, suggesting that prior knowledge impacts relatively early stages of perception<sup>6–15</sup>. A dramatic demonstration of how prior knowledge can create meaning from apparently meaningless inputs occurs with two-tone “Mooney” images<sup>16</sup>, which can become recognizable following the presentation of perceptual hints<sup>17,18</sup>.

Although there is general acceptance that knowledge can shape perception, there are fundamental unanswered questions concerning the *type* of knowledge that can exert such effects. Previous demonstrations of recognition of Mooney images by knowledge have used *perceptual* hints such as pointing out where the meaningful image is located or showing people the

completed version of the image. Our first question is whether category information cued linguistically—in the absence of any perceptual hints<sup>cf. 17,19</sup>—can have similar effects. Second, it remains unclear whether such effects of knowledge reflect modulation of low-level perception and if so, when during visual processing such modulation occurs. Some have argued that benefits of knowledge on perception reflects late, post-perceptual processes occurring only after processes that could be reasonably called perceptual<sup>20</sup>. In contrast, recent fMRI experiments have observed knowledge-based modulation of stimulus-evoked activity in sensory regions, suggesting an early locus of top-down effects<sup>21–24</sup>. However, the sluggish nature of the BOLD signal makes it difficult to distinguish between knowledge affecting bottom-up processing from later feedback signals to the same regions.

One way that prior knowledge may influence perception is by biasing baseline activity in perceptual circuits, pushing the interpretation of sensory evidence towards that which is expected<sup>25</sup>. Biasing of prestimulus activity according to expectations has been observed both in decision- and motor-related prefrontal and parietal regions<sup>26–28</sup> as well as in sensory regions<sup>21,29,30</sup>. In visual regions, alpha-band oscillations are thought to play an important role in modulating prestimulus activity according to expectations. For example, prior knowledge of the location of an upcoming stimulus changes preparatory alpha activity in retinotopic cortex<sup>31–34</sup>. Likewise, expectations about *when* a visual stimulus will appear are reflected in prestimulus alpha dynamics<sup>35–37</sup>. Recently, Mayer and colleagues demonstrated that when the identity of a target letter could be predicted, prestimulus alpha power increased over left-lateralized posterior sensors<sup>38</sup>. These findings suggest that alpha-band dynamics are involved in establishing perceptual predictions in anticipation of perception.

Here, we examined whether verbal cues that offered no direct perceptual hints can improve visual recognition of indeterminate two-tone “Mooney” images (Experiment 1). We then measured whether such verbally ascribed meaning affected an objective visual discrimination task (Experiments 2-3). Finally, we recorded electroencephalography (EEG) during the visual discrimination task (Experiment 4) to better understand the locus at which knowledge influenced perception. Our findings suggest that using language to ascribe meaning to ambiguous images impacts early visual processing by biasing prestimulus neural activity in the alpha-band.

## Materials and Method

### Experiment 1

*Materials.* We constructed 71 Mooney images by superimposing familiar images of easily nameable and common artefacts and animals onto patterned background. These superimposed images were then blurred (Gaussian Blur) and then thresholded to a black-and-white bitmap. Materials are available at <https://osf.io/stvgy/>.

#### *Procedure.*

*Experiment 1A. Free Naming.* We recruited 94 participants from Amazon Mechanical Turk. Each participant was randomly assigned to view one of 4 subsets of the 71 Mooney images, and to name at the basic-level what they saw in each image. Each image was seen by approximately 24 people. Naming accuracies for the 71 images (see below for details on how these were computed) ranged from 0% to 95%.

*Experiment 1B. Basic Level Cues.* From the 71 images used in Exp. 1A we selected the images with accuracy at or below 33% (29 images). We then presented these images to an additional 42 participants recruited from Amazon Mechanical Turk. Each participant was shown one of two subsets of the 29 images and asked to choose among 29 basic-level names (e.g., “trumpet”, “leopard”, “table”), which object they thought was present in the image (i.e., a 29-alternative forced choice). Each image received approximately 21 responses.

*Experiment 1C. Superordinate Cues.* Out of the 29 images used in Exp. 1B we selected 15 that had a clear superordinate label (see Fig. 1). Twenty additional participants recruited from Amazon Mechanical Turk were presented with each image along with its corresponding superordinate label and were asked to name, at the basic level, the object they saw in their picture by typing their response. For example, given the superordinate cue “musical instrument”, participants were expected to respond with “trumpet” given a Mooney image of a trumpet.

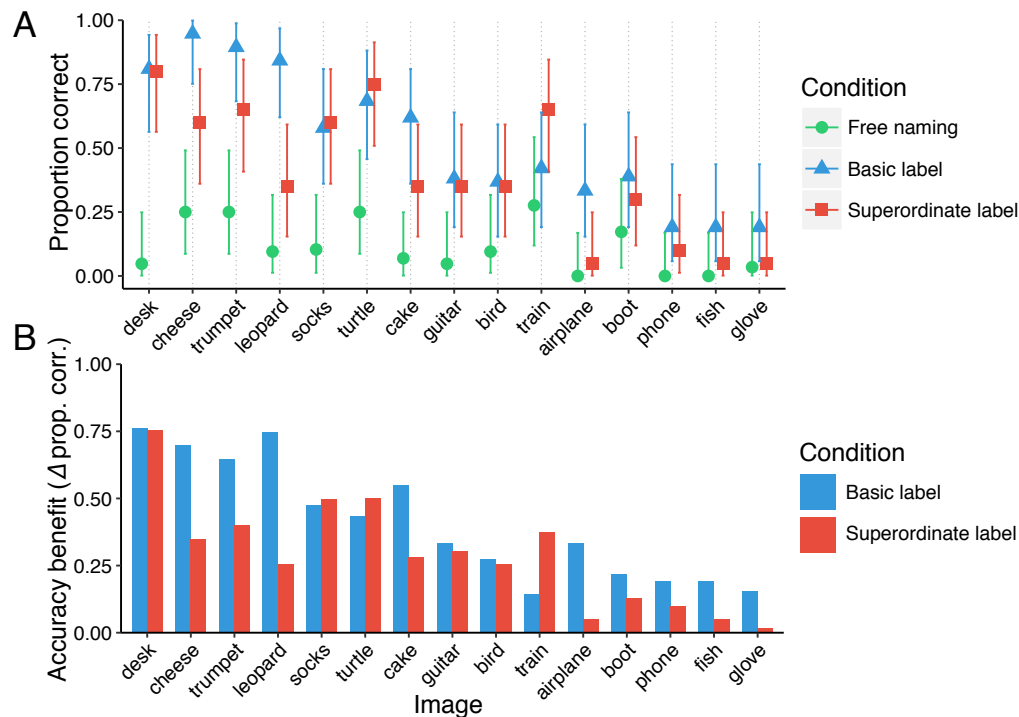

**Fig. 1.** Recognition accuracy from naïve observers (Experiment 1). (A) Mean accuracy in the free naming, basic, and superordinate label cue conditions by image. Error bars depict  $\pm 1$  SEM. (B) Mean benefit of basic and superordinate cues.

## Experiment 2

**Materials.** From the set of 15 categories used in Exp. 1C, we chose the 10 that had the highest accuracy in the basic-level cue condition (Exp. 1B) and were most benefited by the cues (boot, cake, cheese, desk, guitar, leopard, socks, train, trumpet, turtle). The images subtended approximately  $7^\circ \times 7^\circ$  of visual angle. Each category (e.g., guitar) was instantiated by four variants: two different image backgrounds and two different positions of the images. These additional images were introduced to tease apart potential detection effects be driven by low-level processing alone.

**Participants.** We recruited 35 college undergraduates to participate in exchange for course credit. Two were eliminated for low accuracy (less than 77%), resulting in 14 participants in the *meaning trained* condition (8 female), and 19 in the *meaning untrained* condition (11 female). All participants provided written informed consent. The University of Wisconsin-Madison Institutional Review Board approved this and all other studies reported here.

*Familiarization Procedure.* Participants were randomly assigned to a *meaning trained* or *meaning untrained* condition. The two conditions differed only in how participants were familiarized with the images. In the meaning trained condition participants first viewed each Mooney image accompanied by an instruction, e.g., “Please look for CAKE”, twice for each Mooney image (Trials 1-20). Participants then saw all the images again and were asked to type in what they saw in each image, guessing in the case that they could not see anything (Trials 21-30). Finally, participants were shown each image again, asked to type in the label once more and asked to rate on a 1-5 how certain they were that the image portrayed the object they typed. In the meaning untrained condition, participants were familiarized with the images while performing a one-back task, being asked to press the spacebar anytime an image was repeated back-to-back. Repetitions occurred on 20-25% of the trials. In total, participants in the meaning-trained and untrained conditions saw each image 4 and 5 times respectively.

*Same/Different Task.* Following familiarization, participants’ were tested in their ability to visually discriminate pairs of Mooney images. Their task was to indicate whether the two images were physically identical or different in any way (Fig. 2A). Each trial began with a central fixation cross (500 ms), followed by the presentation of one of the Mooney images (the “cue”) approximately 8° of visual angle above, below, to the left or to the right of fixation. After 1500 ms the second image (the “target”) appeared in one of the remaining cardinal positions. The two images remained visible until the participant responded “same” or “different” using the keyboard (hand-response mapping was counterbalanced between participants). Accuracy feedback (a buzz or bleep) sounded following the response, followed by a randomly determined inter-trial interval (blank screen) between 250 and 450 ms. Image pairs were equally divided into three trial-types (Fig 2C): (1) two identical images (same trials), (2) same object, but different location, (3) different-objects at different locations. The backgrounds of the two images on a given trial were always the same and On a given trial, both cue and target objects were either trained or untrained. Participants completed 6 practice trials followed by 360 testing trials.

*Behavioral Data Analysis.* Accuracy was modeled using logistic mixed effects regression with experiment block and trial-type random slopes and subject and item-category random intercepts.

RTs were modeled in the same way, but using linear mixed effects regression. RT analyses excluded responses longer than 5s and those exceeding 3SDs of the subject's mean.

### Experiment 3

*Participants.* We recruited 32 college undergraduates to participate in exchange for course credit. 16 were assigned to the meaning trained condition (13 female), and the other 16 to the meaning untrained condition (12 female).

*Familiarization Procedure and Task.* The familiarization procedure, task, and materials were identical to Experiment 2 except that the first and second images (approximately  $6^{\circ} \times 6^{\circ}$  of visual angle) were presented briefly and sequentially at the point of fixation, in order to increase difficulty and better test for effects of meaning on task accuracy (see Fig. 2B). On each trial, the initial cue image was presented for 300 ms for the initial 6 practice trials and 150 ms for the 360 subsequent trials. The image was then replaced by a pattern mask for 167 ms followed by a 700 ms blank screen, followed by the second target image. Participants' task, as before, was to indicate whether the cue and target images were identical. The pattern masks were black-and-white bitmaps consisting of randomly intermixed ovals and rectangles (<https://osf.io/stvgv/>).

*Behavioral Data Analysis.* Exclusion criteria and analysis were the same as in Experiment 2.

### Experiment 4

*Participants.* Nineteen college undergraduates were recruited to participate in exchange for monetary compensation. 3 were excluded from any analysis due to poor EEG recoding quality, resulting in 16 participants (9 female) with usable data. All participants reported normal or corrected visual acuity and color vision and no history of neurological disorders.

*Familiarization Procedure and Task.* The familiarization procedure, task, and materials were nearly identical to that used for Experiment 3, but modified to accommodate a within-subject design. For each participant, 5 of the 10 images were assigned to the meaning trained condition and the remaining to the meaning untrained condition, counterbalanced between subjects. Participants first viewed the 5 Mooney images in the meaning condition together with their

names (trials 1-10), with each image seen twice. Participants then viewed the same images again and asked to type in what they saw in each image (trials 11-15). For trials 16-20 participants were again asked to enter labels for the images and prompted after each trial to indicate on a 1-5 scale how certain they were that the image portrayed the object they named. During trials 21-43 participants completed a 1-back task identical to that used in Experiments 2-3 as a way of becoming familiarized with the images assigned to the meaning untrained condition. Participants then completed 360 trials of the same/different task described in Experiment 3.

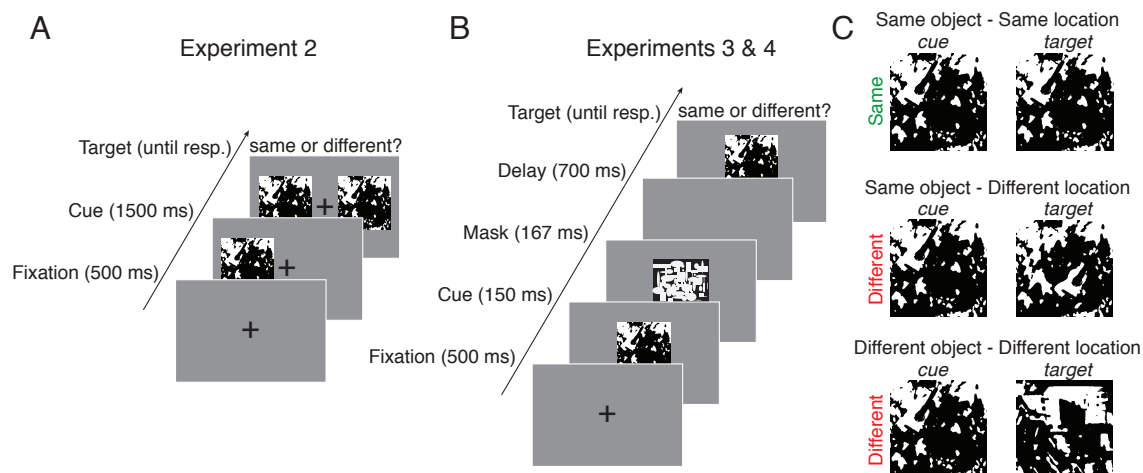

**Fig. 2.** Schematic of the procedure for Experiments 2-4. (A) In Experiment 2, participants determined whether two Mooney images were physically identical. (B) To increase task difficulty, Experiments 3 and 4 used sequential masked presentation. (C) To test for the selectivity of meaning effects, 'different' image pairs could differ in object location or object identity. In Experiments 2 and 3, knowledge of the objects was manipulated between participants. In Experiment 4, each participant was exposed to the meanings of a random half of the objects (see Familiarization Procedure).

**EEG Recording and Preprocessing.** EEG was recorded from 60 Ag/AgCl electrodes with electrode positions conforming to the extended 10–20 system. Recordings were made using a forehead reference electrode and an Eximia 60-channel amplifier (Nextim; Helsinki, Finland) with a sampling rate of 1450 Hz. Preprocessing and analysis was conducted in MATLAB (R2014b, Natick, MA) using custom scripts and the EEGLAB toolbox<sup>39</sup>. Data were downsampled to 500 Hz offline and were divided into epochs spanning –1500 ms prior to cue onset to +1500 ms after target onset. Epochs with activity exceeding  $\pm 75 \mu\text{V}$  at any electrode site were automatically discarded. Independent components responsible for vertical and horizontal eye artifacts were identified from an independent component analysis (using the *runica*



algorithm implemented in EEGLAB) and subsequently removed. Visually identified channels with poor contact were spherically interpolated. After these preprocessing steps, we applied a Laplacian transform to the data using spherical splines<sup>40</sup>. The Laplacian is a spatial filter (also known as current scalp density) that aids in topographical localization and converts the data into a reference-independent scheme, allowing researchers to more easily compare results across labs; the resulting units are in  $\mu\text{V}/\text{cm}^2$ . For recent discussion on the benefits of the surface Laplacian for scalp EEG see<sup>41,42</sup>.

*Event-related Potential Analysis.* Cleaned epochs were filtered between 0.5 and 25 Hz using a first-order Butterworth filter (MATLAB function *butter.m*). Data were time-locked to target onset, baselined using a subtraction of a 200 ms prestimulus window, and sorted according to target meaning condition (trained or untrained). To quantify the effect of meaning on early visual responses, we focused on the amplitude of the visual P1 component. Following prior work in our lab that found larger left-lateralized P1 amplitudes to images preceded by linguistic cues<sup>43</sup>, we derived separate left and right regions of interest by averaging the signal from occipito-parietal electrodes PO3/4, P3/4, P7/8, P9/10, and O1/2. P1 amplitude was defined as the average of a 30 ms window, centered on the P1 peak as identified from the grand average ERP (see Fig. 4A). Lastly, in order to relate P1 amplitude and latencies to behavior, we used a single-trial analysis. As in prior work<sup>43</sup>, single-trial peaks were determined from each electrode cluster (left and right regions of interest) by extracting the largest local voltage maxima between 70 to 150 ms post-stimulus (using the MATLAB function *findpeaks*). Any trial without a detectable local maximum (on average  $\sim 1\%$ ) was excluded from analysis.

*Time-Frequency Analysis.* Time-frequency decomposition was performed by convolving single trial data with a family of Morelet wavelets, spanning 3–50 Hz, in 1.6-Hz steps, with wavelet cycles increasing linearly between 3 and 10 cycles as a function of frequency. Power was extracted from the resulting complex time series by squaring the absolute value of the time series. To adjust for power-law scaling, time-frequency power was converted into percent signal change relative to a common condition pre-cue baseline of –400 to –100 ms. To identify time-frequency-electrode features of interest for later analysis in a data-driven way while avoiding circular inference, we first averaged together all data from all conditions and all electrodes. This

revealed a prominent (~65% signal change from baseline) task-related increase in alpha-band power (8-14 Hz) during the 500 ms preceding target onset, with a clear posterior scalp distribution (see Fig. 5A). Based on this, we focused subsequent analysis on 8-14 Hz power across the prestimulus window -500 to 0 ms using the same left/right posterior electrode clusters as in the ERP analysis.

*Statistical Analysis.* The effect of meaning training on the time course of prestimulus alpha power (see Fig. 5B) was analyzed with a non-parametric permutation test, the result of which was cluster corrected to deal with multiple comparisons across time points<sup>44</sup>. This was accomplished by randomly shuffling the association between condition labels (meaning trained or untrained) and alpha power 10,000 times. On every iteration, a *t*-statistic was computed for each time sample and the largest number of contiguous significant samples was saved, forming a distribution of *t*-statistics under the null hypothesis that meaning training had no effect, as well as a distribution of cluster sizes expected under the null. The *t*-statistic associated with the true data mapping was compared, at each time point, against this null distribution and only cluster sizes exceeding the 95% percentile of the null cluster distribution was considered statistically different.  $\alpha$  was set at 0.05 for all comparisons. Prestimulus alpha power was additionally analyzed by means of a linear mixed-effects model using meaning condition (trained vs. untrained) and electrode cluster (left vs. right hemisphere) and their interaction to predict alpha power (here averaged across the prestimulus window -500 to 0 ms) with random slopes for meaning condition and hemisphere by subject. The same model was used to predict averaged P1 amplitudes. Where correlations are reported, we used Spearman rank coefficients to test for monotonic relationships while mitigating the influence of potential outliers.

## Results

### Experiment 1

Mean accuracy for the 15 images used in all versions of Experiment 1 is displayed in Fig. 1A. The benefit conferred by different cue-types relative to a free naming baseline shown in Fig. 1B. Baseline recognition performance was 11%. Providing participants with a list of 29 possibilities increased recognition to 52%, a 4.7-fold increase (Exp. 1B),  $b = .41$ , 95% CI [.31, .51],  $t = 8.07$ ,  $p < .0005$ . Providing participants with superordinate labels (e.g., “animal”, “musical instrument”)

boosted performance to 40%, a nearly 4-fold increase compared to the 11% baseline,  $b = .29$ , 95% CI [.19, .39],  $t = 5.66$ ,  $p < .0005$ . For example, knowing that there is a piece of furniture in the image produced a 16-fold increase in accuracy in recognizing it as a desk (an impressive result even allowing for guessing). The recognition advantage that verbal cues provide is especially striking given that they do not provide any spatial or other perceptual information to the identity of the image.

## Experiment 2

Results are shown in Fig. 3. Overall accuracy was high—93.1% (93.5% on different trials and 92.2% on same trials) and not significantly affected by training with meaning training ( $z < 1$ ). This is not surprising given that participants had unlimited time to inspect the two images. Participants exposed to the meaning of the images, however, had significantly shorter RTs than those who were not exposed to image meanings:  $RT_{\text{meaning}} = 824$  ms;  $RT_{\text{no-meaning}} = 1018$  ms ( $b = 192$ , 95% CI = [59, 327],  $t = 2.82$ ,  $p = .008$ ; see Fig. 3). There was a marginal trial-type by meaning interaction ( $b = 73$ ,  $t = 1.98$ ,  $p = .06$ ). Meaning was most beneficial in detecting that two images were exactly identical, ( $b = 260$ ,  $t = 2.77$ ,  $p = .009$ ). There remained a significant benefit of meaning in detecting difference in images with the same object in a different location, ( $b = 203$ ,  $t = 2.63$ ,  $p = .01$ ) and a smaller but still reliable difference when two images had different objects and object locations, ( $b = 117$ ,  $t = 2.33$ ,  $p = .03$ ).

## Experiment 3

The brief, masked presentation of the first image had an expected detrimental effect on accuracy, which was now 86.9% (89.9% on different trials and 81.1% on same trials). Exposing participants to the image meanings significantly improved accuracy:  $M_{\text{meaning}} = 90.9\%$ ;  $M_{\text{no-meaning}} = 82.9\%$  ( $b = .67$ , 95% CI = [.22, 1.12],  $z = 2.93$ ,  $p = .003$ ; Fig. 3). The meaning advantage interacted significantly with trial type ( $b = .30$ , 95% CI = [.08, .52],  $z = 2.65$ ,  $p = .008$ ). The advantage of being exposed to meaning was again largest for the identical-image trials ( $b = 1.10$ ,  $z = 4.25$ ,  $p < .0001$ ). It was slightly smaller when the two images showed the same object in different locations ( $b = .53$ ,  $z = 2.13$ ,  $p = .03$ ), and when the two images showed different objects in different locations ( $b = .67$ ,  $z = 1.76$ ,  $p = .08$ ).

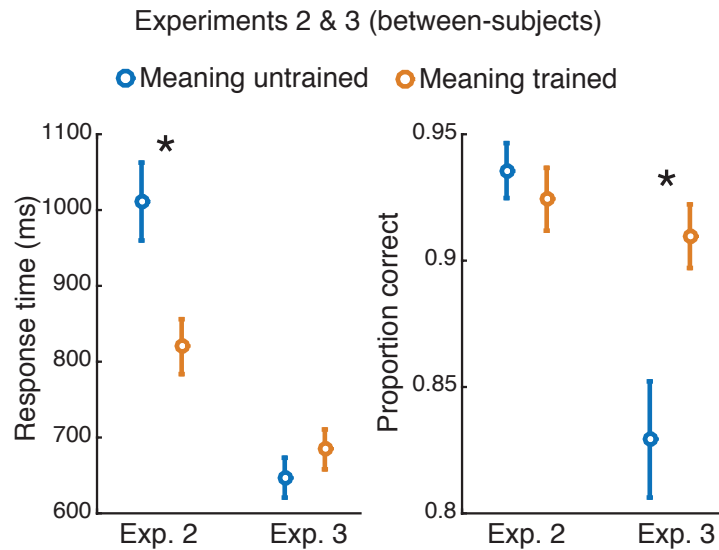

**Fig. 3.** Response time (left panel) and accuracy (right panel) for Experiments 2 and 3. Meaning training significantly decreased response time in Experiment 2 (when both images were presented simultaneously and remained visible until response), and significantly improved accuracy in Experiment 3 (when images were presented briefly and sequentially). Error bars show  $\pm 1$  SEM; asterisks indicated two-tailed significance at  $p < 0.05$ .

## Experiment 4

**Behavior.** Overall accuracy was 89.0% (92.8% on different trials and 81.3% on same trials). Participants were marginally more accurate when judging images previously rendered meaningful compared to images whose meaning was untrained ( $b = .22$ , 95% CI =  $[-.02, .46]$ ,  $z = 1.82$ ,  $p = .07$ ; Fig. 4A). The meaning-by-trial-type interaction was not significant. Participants became more accurate over time for both meaning trained and meaning untrained images ( $b = .34$ ,  $z = 4.47$ ,  $p < .0001$ ). The meaning-by-block interactions were not significant,  $t < 1$ . Overall RT was 641 ms, and was marginally shorter when discriminating images that were previously rendered meaningful, ( $b = -9.4$ , 95% CI =  $[-19.8, 1.0]$ ,  $t = 1.77$ ,  $p = .08$ ). The meaning-by-trial-type and meaning-by-block interactions for RTs were not significant,  $t < 1$ . We can combine accuracy and RTs into a single by-subject *inverse efficiency score*<sup>45</sup> by dividing each subject's meaningful and meaningless trial RTs by their respective accuracies. Efficiency was significantly better on meaningful trials,  $M = 734$  than meaningless trials,  $M = 756$  ( $b = 22.1$ ,  $t = 2.73$ ,  $p = .02$ ).

**Electrophysiology.** As shown in Fig. 4B, trial-averaged P1 amplitude was significantly larger when viewing targets previously made meaningful ( $b = -1.7$ ,  $t = -2.16$ ,  $p = .037$ ). Although there was no significant interaction with hemisphere, follow-up t-tests revealed P1 amplitude modulation by meaning at the left hemisphere electrode cluster ( $t(1,15) = 2.59$ ,  $p = .020$ ), but not at right ( $t(1,15) = .35$ ,  $p = .725$ ). This same analysis was repeated for cue-evoked P1 amplitudes. Interestingly, no main effect or interaction was observed ( $ps > 0.7$ ), suggesting that the effect of

meaning on P1 amplitudes was specific to the target-evoked response. Analysis of the time course of prestimulus alpha power revealed a temporal cluster of significantly greater power on meaning-trained trials from approximately -480 to -250 ms prior to target onset. Like the P1 effect, this difference was observed over left occipito-parietal sensors, but not right (see Fig. 5B). The linear mixed-effects model of alpha power (averaged over the 500 ms prior to target onset) revealed a significant effect of meaning ( $b=-9.85$ ,  $t=-2.3$ ,  $p=.03$ ), indicating greater prestimulus alpha power on meaning trained trials, and a significant interaction between hemisphere and meaning ( $b=8.31$ ,  $t=2.75$ ,  $p=.014$ ). Paired t-tests revealed that meaning affected prestimulus alpha power in the left ( $t(1,15)=2.21$ ,  $p=.043$ ), but not right ( $t(1,15)=0.35$ ,  $p=.729$ ) hemisphere.

**Fig. 4. Behavior and electrophysiology results from Experiment 4.** (A) Response time (left panel), accuracy (middle panel), and the inverse efficiency score (right panel) showed trending or significant improvements for images previously made meaningful. (B) Analysis of the P1 event-related potential revealed larger amplitude responses to meaning trained targets over left posterior electrodes (upper panel; electrode clusters denoted with black dots), but not right (lower panel). The modulation of responses ~ 120 ms post-target suggests that prior knowledge impacts early stages of visual processing. Error bars and shaded bands represent  $\pm 1$  within-subjects SEM<sup>85</sup>; asterisks indicated two-tailed significance at  $p<0.05$ ; daggers represent two-tailed trends at  $p<0.08$ .

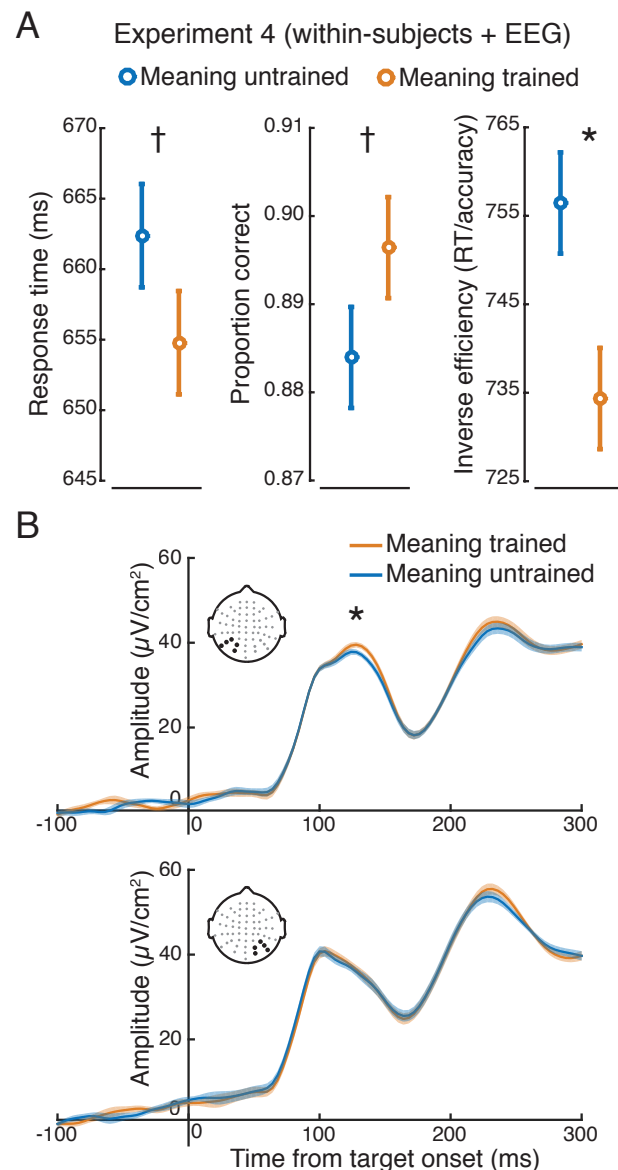

We next assessed the relationship between the meaning effect on prestimulus alpha power and the meaning effect on P1 amplitudes across participants by correlating alpha modulations (averaged over the prestimulus window) with P1 modulations. This analysis revealed a significant positive correlation ( $\rho=0.52$ ,  $p=.037$ ) indicating that individuals who showed a greater increase in prestimulus alpha by meaning training also had a larger magnitude effect of meaning on P1 amplitudes (see Fig. 6). This relationship was not significant over right hemisphere electrodes ( $\rho = -0.21$ ), and the two correlations were significantly different ( $p=.042$ ), suggesting that these interactions may be specific to the left hemisphere. Together, these results demonstrate that prior knowledge of the meaning of an ambiguous stimulus increases preparatory alpha power, enhances early visual responses, and suggests that these two processes are related. The general finding that effects of meaning are stronger over the left hemisphere than the right may indicate the linguistic source of the meaning<sup>46</sup>: participants, after all, were verbally instructed as to the meaning of the images, or relatedly, the more categorical representations induced by language<sup>43,47,48</sup>.

Finally, we used linear mixed effects models with subject and item random effects to examine the relationship between *per-trial* P1 peak amplitudes and latencies to the accuracy and latency of behavioral responses. See <https://osf.io/stvggy/> for full model syntax. We focused on P1 peaks from the cluster of left electrodes because these sensors were driving the significant P1 main-effect at the trial-averaged model (see above), and the significant alpha power interaction (see above), and because a similar experiment in our lab also found P1 modulation by linguistic cues only over left occipito-parietal sensors<sup>43</sup>. Per-trial amplitudes were numerically greater for meaningful trials ( $M=64.42 \mu V$ ) than meaningless trials ( $M=63.70 \mu V$ ), but not significantly so,  $b=.86$ ,  $95\%CI = [-.78, 2.51]$ ,  $t=1.03$ ,  $p=.31$ . There was a significant interaction between behavioral RT and meaningfulness such that on meaningful trials, larger P1s were associated with faster behavioral responses (controlling for accuracy),  $b=-0.008$ ,  $95\%CI = [-0.013, -0.002]$ ,  $t=2.68$ ,  $p=.007$ . On meaningless trials, no such relationship was observed,  $b=0.00065$ ,  $t<1$ .

Intriguingly, P1 latencies were slightly, but significantly delayed on meaningful ( $M=114.8$  ms) compared to meaningless trials ( $M=113.4$ ),  $b=1.50$ ,  $95\%CI = [.50, 2.50]$ ,  $t=2.96$ ,  $p=.003$ . A later



P1 seems suboptimal, yet within subjects, later P1s were associated with shorter RTs,  $b=-0.003$ ,  $95\%CI = [-.0054, -.0005]$ ,  $t=2.33$ ,  $p=.02$  (no interaction with meaningfulness was observed).

**Fig. 5. Time-frequency analysis of alpha-band power during the cue-target interval (Experiment 4).** (A) To identify time-frequency-electrode regions of interest while avoiding circular inference, we averaged time-frequency power across all electrodes and conditions. This revealed a prominent increase ( $\sim 65\%$  from baseline) in pre-target ( $-500$  to  $0$  ms) power in the alpha range ( $8-14$  Hz) that had a posterior topography (right panel; left and right electrode clusters of interest denoted with white dots) associated with simply performing the task. We then focused on how meaning training impacted this signal in subsequent analyses. (B) Time-frequency power plots showing the difference (meaning trained – meaning untrained) for left (left panel) and right (right panel) electrodes of interest (derived from panel A) reveal greater alpha power just prior to target onset on meaning trained trials. The lower panels depicts the time-course of the pre-target alpha signal for meaning trained and untrained trials, revealing a significant temporal cluster of increased alpha power approximately  $480$  to  $250$  ms prior to target onset over left, but not right electrode clusters. Shaded regions represent  $\pm 1$  within-subjects SEM<sup>85</sup>.

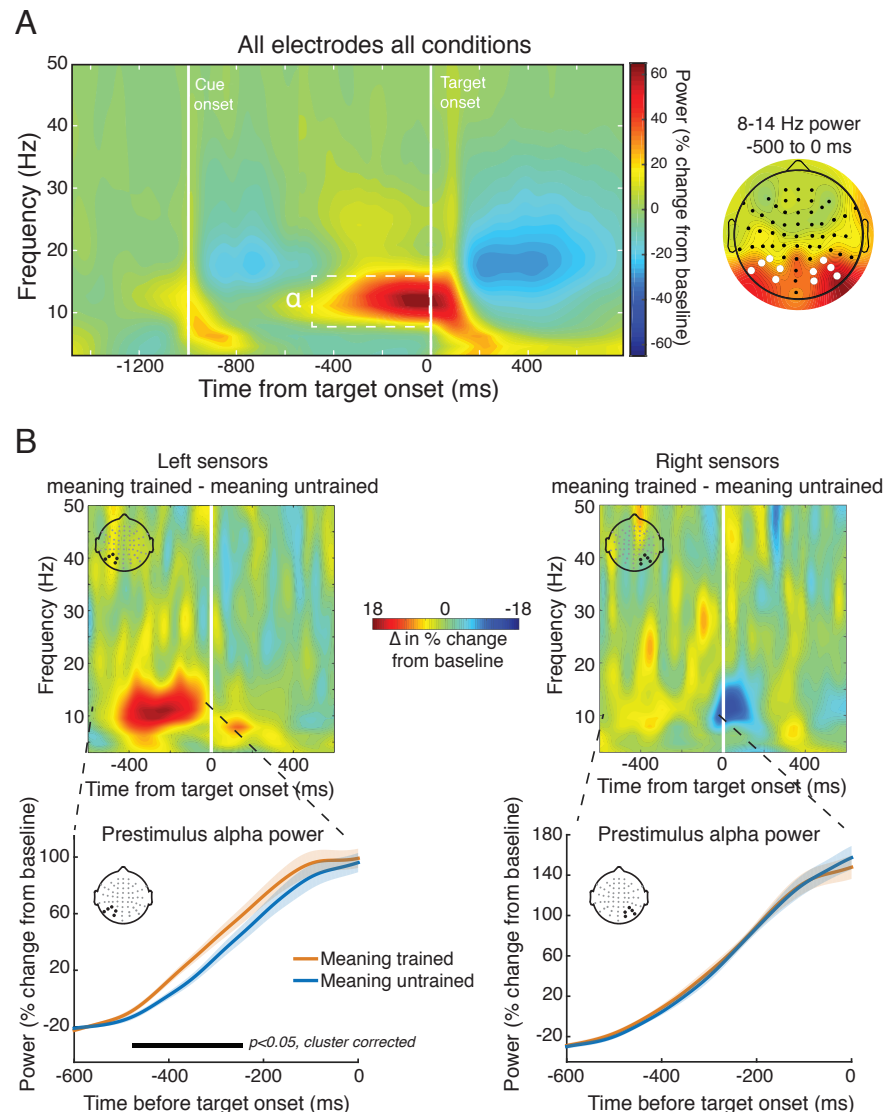

*Control Analyses.* To determine whether participants' improved performance for the verbally cued images could be explained by learning *where* the object was located and looking to those locations we analyzed electrooculograms (EOGs, prior to ocular correction from ICA) recorded from bipolar electrodes placed on the lateral canthus and lower eyelid of each participant's right eye during the EEG recording. If participants more frequently engaged in eye movement during the cue-target interval of meaning-trained trials we would expect, on average, larger amplitude EOG signals following the cue. However, EOG amplitudes, time-locked to the onset of the cue, did not reliably distinguish between meaning-trained and meaning-untrained trials in the way that alpha power during this same interval did. EOG amplitudes on meaning-trained trials also did not reliably differ when trials were sorted by the location of the object in the cue image: whether it was on the left or right side, on the top or bottom, or lateral or vertical relative to center. Across the whole cue-target interval, no contrast survived the same cluster correction procedure applied to the alpha time-course analysis, suggesting that eye movements are unlikely to explain our EEG findings.

**Fig. 6.** The magnitude of the meaning training effect on prestimulus alpha power predicts the magnitude of the meaning effect on P1 amplitude across participants. This indicates that individuals who showed a greater increase in prestimulus alpha power on meaning trained trials also showed a greater increase in P1 amplitude. Data derived from the left hemisphere electrode cluster; the correlation using the right hemisphere cluster was non-significant.

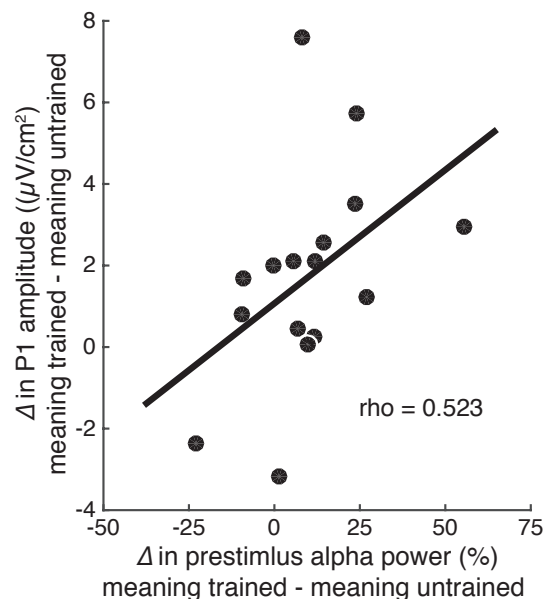

To further investigate the possibility that participants covertly attended to the location of the object in the cue image, we tested for well-known effects of spatial attention on alpha lateralization. Numerous studies, reviewed in <sup>49</sup>, have demonstrated alpha power



desynchronization at posterior electrodes contralateral to the attended location. Thus, if subjects were maintaining covert attention, for example, to the left side of the image following a cue with a left object, then alpha power should decrease over right sensors relative to when a cue has an object on the right, and vice versa. Contrary to this prediction, we observed no modulation of alpha power at either left or right electrode clusters as a function of object location within the Mooney image. Again, no contrasts across the cue-target interval survived cluster correction. This suggests that spatial attention is unlikely to be the source of the effects of meaning training.

## Discussion

To better understand when and how prior knowledge influences perception we first examined how non-perceptual cues influence recognition of initially meaningless Mooney images. These verbal cues resulted in substantial recognition improvements. For example, being told that an image contained a piece of furniture produced a 16-fold increase in recognizing a desk. We next examined whether ascribing meaning to the ambiguous images improved not just people's ability to *recognize* the denoted object, but to perform a basic perceptual task: distinguishing whether two images were physically identical. Indeed, ascribing meaning to the images through verbal cues improved people's ability to determine whether two simultaneously or sequentially presented images were the same or not (Fig. 3 and 4). The behavioral advantage might still be thought to reflect an effect of meaningfulness on some relatively late process were it not for the electrophysiological results showing that ascribing meaning led to increase in the amplitude of P1 responses to the target (Fig. 4B)<sup>cf. 50</sup>. The P1 enhancement was preceded by an increase in alpha amplitude during the cue-target interval when the cue was meaningful (Fig. 5). The effect of meaning training on pre-target alpha power and target-evoked P1 amplitude were positively correlated across participants, such that individuals who showed larger increases in pre-target alpha power as a result of meaning training, also showed larger increases in P1 amplitude (Fig. 6).

Combined, our results contradict claims that knowledge affects perception only at a very late stage<sup>51,20,52</sup> and provide general support for predictive processing accounts of perception, positing that knowledge may feed back to modulate lower levels of perceptual processing<sup>3,25,53</sup>. Our results are also the first to show that making ambiguous images meaningful via

nonperceptual linguistic cues enhances not only the ability to recognize the images, but also a putatively lower-level process subserving visual discrimination.

The P1 ERP component is associated with relatively early regions in the visual hierarchy (most likely ventral peristriate regions within Brodmann's Area 18<sup>54-57</sup>) but it has been shown to be sensitive to top-down manipulations such as spatial cueing<sup>58,59</sup>, object based attention<sup>60</sup>, object recognition<sup>61,62</sup>, and recently, trial-by-trial linguistic cuing<sup>43</sup>. Our finding that averaged P1 amplitudes were increased following meaning training is thus most parsimoniously explained as prior knowledge having an early locus in its effects on visual discrimination (although the failure to find this effect in the single-trial EEG suggests some caution in its interpretation). This result is consistent with prior fMRI findings implicating sectors of early visual cortex in the recognition of Mooney images<sup>17,63</sup> but extends these results by demonstrating that the timing of Mooney recognition is consistent with the modulation of early, feedforward visual processing.

Interestingly, the effect of meaning on P1 amplitude was present only in response to the target stimulus, and not the cue. This suggests that, in our task, prior knowledge impacted early visual responses in a dynamic manner, such that experience with the verbal cues facilitated the ability to form expectations for a subsequently "target" image. We speculate that this early target-related enhancement may be accomplished by the temporary activation of the cued perceptual features (reflected in sustained alpha power) rather than by an immediate interaction with long-term memory representations of the meaning-trained features, which would be expected to lead to enhancements of both cue and target p1. Another possibility is that long-term memory representations are brought to bear on the meaning-trained "cue" images, but these affect later perceptual and post-perceptual processes.

Our findings are also in line with two recent magnetoencephalography (MEG) studies reporting early effects of prior experience on subjective visibility ratings<sup>38,64</sup>. In those studies, however, prior experience is difficult to disentangle from perceptual repetition. For example, Aru et al., (2016) compared MEG responses to images that had previously been studied against images that were completely novel, leaving open mere exposure as a potential source of differences. In our task, by contrast, participants were familiarized with both meaning trained and meaning untrained images but only the identity of the Mooney image was revealed in the meaning

training condition, thereby isolating effects of recognition. Our design further rules out the possibility that stimulus factors (e.g., salience) could explain our effects, since the choice of which stimuli were trained was randomized across subjects. One possible alternative by which meaning training may have had its effect is through spatial attention. For example, it is conceivable that on learning that a given image has a boot on the left side, participants subsequently were more effective in attending to the more informative side of the image. If true, such an explanation would not detract from the behavioral benefit we observed, but would mean that the effects of knowledge were limited to spatial attentional gain. Subsequent analyses suggest this is not the case (see *Control Analyses*).

It is noteworthy that, as in the present results, the two abovementioned MEG studies, as well as related work from our lab employing linguistic cues<sup>43</sup>, have all found early effects over left-lateralized occipito-parietal sensors, perhaps suggesting that the effects of linguistically aided perception may be more pronounced in the left hemisphere perhaps owing to the predominantly left lateralization of lexical processing<sup>46</sup>.

Mounting neurophysiological evidence has linked low-frequency oscillations in the alpha and beta bands to top-down processing<sup>65–68</sup>. Recent work has demonstrated that perceptual expectations modulate alpha-band activity prior to the onset of a target stimulus, biasing baseline activity towards the interpretation of the expected stimulus<sup>28,38</sup>. We provide further support for this hypothesis by showing that posterior alpha power increases when participants have prior knowledge of the meaning of the cue image, which was to be used as a comparison template for the subsequent target. Further, pre-target alpha modulation was found to predict the effect of prior knowledge on target-evoked P1 responses, suggesting that representations from prior knowledge activated by the cue interacted with target processing. Notably, the positive direction of this effect—increased prestimulus alpha power predicted larger P1 amplitudes (Fig. 6)—directly contrasts with previous findings of a negative relationship between these variables<sup>69–71</sup>, which is typically interpreted as reflecting the inhibitory nature of alpha rhythms<sup>72,73</sup>. Indeed, our observation directly contrasts with the notion of alpha as a purely inhibitory or “idling” rhythm. We suggest that, in our task, increased prestimulus alpha-band power may reflect the pre-activation of neurons representing prior knowledge about object identity, thereby facilitating

subsequent perceptual same/different judgments. This is consistent with the finding that evoked gamma and multiunit responses in Macaque inferotemporal cortex are positively correlated with prestimulus alpha power<sup>74</sup>, suggesting that the alpha modulation we observed may have its origin in regions where alpha is not playing an inhibitory role.

Although our results are supportive of a general tenant of predictive processing accounts<sup>8,11,25</sup>—that predictions, formed through prior knowledge, can influence sensory representations—our results also depart in an important way from certain proposals made by predictive coding theorists<sup>8,75,76</sup>. With respect to the neural implementation of predictive coding, it is suggested that feedforward responses reflect the difference between the predicted information and the actual input. Predicted inputs should therefore result in a *reduced* feedforward response. Experimental evidence for this proposal, however, is controversial. Several fMRI experiments have observed reduced visual cortical responses to expected stimuli<sup>77–79</sup>, whereas visual neurophysiology studies describe most feedback connections as excitatory input onto excitatory neurons in lower-level regions<sup>80–82</sup>, which may underlie the reports of enhanced fMRI and electrophysiological responses to expected stimuli<sup>22,38,83</sup>. A recent behavioral experiment designed to tease apart these alternatives found that predictive feedback increased perceived contrast—which is known to be monotonically related to activity in primary visual cortex—suggesting that prediction enhances sensory responses<sup>84</sup>. Our finding that prior knowledge increased P1 amplitude also supports the notion that feedback processes enhance early evoked responses, although teasing apart the scenarios under which responses are enhanced or reduced by predictions remains an important challenge for future research.

## References

1. Marr, D. Vision: A Computational Investigation into the Human Representation and Processing of Visual Information. (Henry Holt and Co., Inc., 1982).
2. Gregory, R. L. Knowledge in perception and illusion. *Philos. Trans. R. Soc. B Biol. Sci.* **352**, 1121–1127 (1997).
3. Lupyan, G. Cognitive Penetrability of Perception in the Age of Prediction: Predictive Systems are Penetrable Systems. *Rev. Philos. Psychol.* **6**, 547–569 (2015).
4. Biederman, I. Recognition-by-components: a theory of human image understanding. *Psychol. Rev.* **94**, 115–147 (1987).
5. Riesenhuber, M. & Poggio, T. Hierarchical models of object recognition in cortex. *Nat. Neurosci.* **2**, 1019–1025 (1999).
6. Frith, C. & Dolan, R. J. Brain mechanisms associated with top-down processes in perception. *Philos. Trans. R. Soc. Lond. B Biol. Sci.* **352**, 1221–1230 (1997).
7. Moore, C. & Cavanagh, P. Recovery of 3D volume from 2-tone images of novel objects. *Cognition* **67**, 45–71 (1998).
8. Rao, R. P. N. & Ballard, D. H. Predictive coding in the visual cortex: a functional interpretation of some extra-classical receptive-field effects. *Nat. Neurosci.* **2**, 79–87 (1999).
9. Lupyan, G., Thompson-Schill, S. L. & Swingle, D. Conceptual Penetration of Visual Processing. *Psychol. Sci.* **21**, 682–691 (2010).
10. Król, M. E. & El-Deredy, W. When believing is seeing: the role of predictions in shaping visual perception. *Q. J. Exp. Psychol.* 2006 **64**, 1743–1771 (2011).
11. Rauss, K., Schwartz, S. & Pourtois, G. Top-down effects on early visual processing in humans: A predictive coding framework. *Neurosci. Biobehav. Rev.* **35**, 1237–1253 (2011).
12. Lupyan, G. & Ward, E. J. Language can boost otherwise unseen objects into visual awareness. *Proc. Natl. Acad. Sci.* **110**, 14196–14201 (2013).
13. Kok, P., Failing, M. F. & de Lange, F. P. Prior expectations evoke stimulus templates in the primary visual cortex. *J. Cogn. Neurosci.* **26**, 1546–1554 (2014).
14. Vandenbroucke, A. R. E., Fahrenfort, J. J., Meuwese, J. D. I., Scholte, H. S. & Lamme, V. a. F. Prior Knowledge about Objects Determines Neural Color Representation in Human Visual Cortex. *Cereb. Cortex* bhu224 (2014). doi:10.1093/cercor/bhu224

15. Manita, S. et al. A Top-Down Cortical Circuit for Accurate Sensory Perception. *Neuron* **86**, 1304–1316 (2015).
16. Mooney, C. M. Age in the development of closure ability in children. *Can. J. Psychol.* **11**, 219–226 (1957).
17. Hsieh, P.-J., Vul, E. & Kanwisher, N. Recognition Alters the Spatial Pattern of fMRI Activation in Early Retinotopic Cortex. *J. Neurophysiol.* **103**, 1501–1507 (2010).
18. Goold, J. E. & Meng, M. Visual Search of Mooney Faces. *Front. Psychol.* **7**, (2016).
19. Jemel, B., Pisani, M., Calabria, M., Crommelinck, M. & Bruyer, R. Is the N170 for faces cognitively penetrable? Evidence from repetition priming of Mooney faces of familiar and unfamiliar persons. *Cogn. Brain Res.* **17**, 431–446 (2003).
20. Firestone, C. & Scholl, B. J. Cognition does not affect perception: Evaluating the evidence for ‘top-down’ effects. *Behav. Brain Sci.* **39**, 1–77 (2016).
21. Puri, A. M., Wojciulik, E. & Ranganath, C. Category expectation modulates baseline and stimulus-evoked activity in human inferotemporal cortex. *Brain Res.* **1301**, 89–99 (2009).
22. Esterman, M. & Yantis, S. Perceptual Expectation Evokes Category-Selective Cortical Activity. *Cereb. Cortex* **20**, 1245–1253 (2010).
23. Kok, P., Jehee, J. F. M. & de Lange, F. P. Less Is More: Expectation Sharpens Representations in the Primary Visual Cortex. *Neuron* **75**, 265–270 (2012).
24. Kok, P., Brouwer, G. J., Gerven, M. A. J. van & de Lange, F. P. Prior Expectations Bias Sensory Representations in Visual Cortex. *J. Neurosci.* **33**, 16275–16284 (2013).
25. Summerfield, C. & de Lange, F. P. Expectation in perceptual decision making: neural and computational mechanisms. *Nat. Rev. Neurosci.* **advance online publication**, (2014).
26. Basso, M. A. & Wurtz, R. H. Modulation of Neuronal Activity in Superior Colliculus by Changes in Target Probability. *J. Neurosci.* **18**, 7519–7534 (1998).
27. Donner, T. H., Siegel, M., Fries, P. & Engel, A. K. Buildup of Choice-Predictive Activity in Human Motor Cortex during Perceptual Decision Making. *Curr. Biol.* **19**, 1581–1585 (2009).
28. de Lange, F. P., Rahnev, D. A., Donner, T. H. & Lau, H. Prestimulus Oscillatory Activity over Motor Cortex Reflects Perceptual Expectations. *J. Neurosci.* **33**, 1400–1410 (2013).
29. Erickson, C. A. & Desimone, R. Responses of macaque perirhinal neurons during and after visual stimulus association learning. *J. Neurosci. Off. J. Soc. Neurosci.* **19**, 10404–10416 (1999).

30. Schlack, A. & Albright, T. D. Remembering visual motion: neural correlates of associative plasticity and motion recall in cortical area MT. *Neuron* **53**, 881–890 (2007).
31. Worden, M. S., Foxe, J. J., Wang, N. & Simpson, G. V. Anticipatory Biasing of Visuospatial Attention Indexed by Retinotopically Specific  $\alpha$ -Band Electroencephalography Increases over Occipital Cortex. *J. Neurosci.* **20**, RC63-RC63 (2000).
32. Sauseng, P. et al. A shift of visual spatial attention is selectively associated with human EEG alpha activity. *Eur. J. Neurosci.* **22**, 2917–2926 (2005).
33. van Gerven, M. & Jensen, O. Attention modulations of posterior alpha as a control signal for two-dimensional brain–computer interfaces. *J. Neurosci. Methods* **179**, 78–84 (2009).
34. Samaha, J., Sprague, T. C. & Postle, B. R. Decoding and Reconstructing the Focus of Spatial Attention from the Topography of Alpha-band Oscillations. *J. Cogn. Neurosci.* 1–8 (2016). doi:10.1162/jocn\_a\_00955
35. Rohenkohl, G. & Nobre, A. C. Alpha Oscillations Related to Anticipatory Attention Follow Temporal Expectations. *J. Neurosci.* **31**, 14076–14084 (2011).
36. Bonnefond, M. & Jensen, O. Alpha Oscillations Serve to Protect Working Memory Maintenance against Anticipated Distracters. *Curr. Biol.* **22**, 1969–1974 (2012).
37. Samaha, J., Bauer, P., Cimaroli, S. & Postle, B. R. Top-down control of the phase of alpha-band oscillations as a mechanism for temporal prediction. *Proc. Natl. Acad. Sci.* **112**, 8439–8444 (2015).
38. Mayer, A., Schwiedrzik, C. M., Wibral, M., Singer, W. & Melloni, L. Expecting to See a Letter: Alpha Oscillations as Carriers of Top-Down Sensory Predictions. *Cereb. Cortex* bhv146 (2015). doi:10.1093/cercor/bhv146
39. Delorme, A. & Makeig, S. EEGLAB: an open source toolbox for analysis of single-trial EEG dynamics including independent component analysis. *J. Neurosci. Methods* **134**, 9–21 (2004).
40. Perrin, F., Pernier, J., Bertrand, O. & Echallier, J. F. Spherical splines for scalp potential and current density mapping. *Electroencephalogr. Clin. Neurophysiol.* **72**, 184–187 (1989).
41. Carvalhaes, C. & de Barros, J. A. The surface Laplacian technique in EEG: Theory and methods. *Int. J. Psychophysiol.* **97**, 174–188 (2015).
42. Kayser, J. & Tenke, C. E. On the benefits of using surface Laplacian (current source density) methodology in electrophysiology. *Int. J. Psychophysiol.* **97**, 171–173 (2015).



43. Boutonnet, B. & Lupyan, G. Words Jump-Start Vision: A Label Advantage in Object Recognition. *J. Neurosci.* **35**, 9329–9335 (2015).
44. Maris, E. & Oostenveld, R. Nonparametric statistical testing of EEG- and MEG-data. *J. Neurosci. Methods* **164**, 177–190 (2007).
45. Townsend, J. T. & Ashby, F. G. *The Stochastic Modeling of Elementary Psychological Processes.* (Cambridge University Press, 1983).
46. Gilbert, A. L., Regier, T., Kay, P. & Ivry, R. B. Support for lateralization of the Whorfian effect beyond the realm of color discrimination. *Brain Lang.* **105**, 91–98 (2008).
47. Holmes, K. J. & Wolff, P. Does categorical perception in the left hemisphere depend on language? *J. Exp. Psychol. Gen.* **141**, 439–443 (2012).
48. Edmiston, P. & Lupyan, G. What makes words special? Words as unmotivated cues. *Cognition* **143**, 93–100 (2015).
49. Foxe, J. J. & Snyder, A. C. The role of alpha-band brain oscillations as a sensory suppression mechanism during selective attention. *Percept. Sci.* **2**, 154 (2011).
50. Abdel Rahman, R. & Sommer, W. Seeing what we know and understand: How knowledge shapes perception. *Psychon. Bull. Rev.* **15**, 1055–1063 (2008).
51. Klemfuss, N., Prinzmetal, W. & Ivry, R. B. How Does Language Change Perception: A Cautionary Note. *Front. Psychol.* **3**, (2012).
52. Francken, J. C., Kok, P., Hagoort, P. & de Lange, F. P. The Behavioral and Neural Effects of Language on Motion Perception. *J. Cogn. Neurosci.* **27**, 175–184 (2015).
53. Lupyan, G. & Clark, A. Words and the World: Predictive coding and the language-perception-cognition interface. *Curr. Dir. Psychol. Sci.* **24**, 279–284 (2015).
54. Mangun, G. R., Hillyard, S. A. & Luck, S. J. Electrocortical substrates of visual selective attention. in *Attention and performance 14: Synergies in experimental psychology, artificial intelligence, and cognitive neuroscience* (eds. Meyer, D. E. & Kornblum, S.) 219–243 (The MIT Press, 1993).
55. Russo, F. D., Martínez, A. & Hillyard, S. A. Source Analysis of Event-related Cortical Activity during Visuo-spatial Attention. *Cereb. Cortex* **13**, 486–499 (2003).
56. Martínez, A. et al. Involvement of striate and extrastriate visual cortical areas in spatial attention. *Nat. Neurosci.* **2**, 364–369 (1999).



57. Mangun, G. R., Hopfinger, J. B., Kussmaul, C. L., Fletcher, E. M. & Heinze, H. J. Covariations in ERP and PET measures of spatial selective attention in human extrastriate visual cortex. *Hum. Brain Mapp.* **5**, 273–279 (1997).
58. Voorhis, S. V. & Hillyard, S. A. Visual evoked potentials and selective attention to points in space. *Percept. Psychophys.* **22**, 54–62 (1977).
59. Mangun, G. R. & Hillyard, S. A. Spatial gradients of visual attention: behavioral and electrophysiological evidence. *Electroencephalogr. Clin. Neurophysiol.* **70**, 417–428 (1988).
60. Valdes-Sosa, M., Bobes, M. A., Rodriguez, V. & Pinilla, T. Switching attention without shifting the spotlight object-based attentional modulation of brain potentials. *J. Cogn. Neurosci.* **10**, 137–151 (1998).
61. Freunberger, R. et al. Functional similarities between the P1 component and alpha oscillations. *Eur. J. Neurosci.* **27**, 2330–2340 (2008).
62. Doniger, G. M., Foxe, J. J., Murray, M. M., Higgins, B. A. & Javitt, D. C. Impaired visual object recognition and dorsal/ventral stream interaction in schizophrenia. *Arch. Gen. Psychiatry* **59**, 1011–1020 (2002).
63. Loon, A. M. van et al. NMDA Receptor Antagonist Ketamine Distorts Object Recognition by Reducing Feedback to Early Visual Cortex. *Cereb. Cortex* bhv018 (2015). doi:10.1093/cercor/bhv018
64. Aru, J., Rutiku, R., Wibral, M., Singer, W. & Melloni, L. Early effects of previous experience on conscious perception. *Neurosci. Conscious.* **2016**, niw004 (2016).
65. Bastos, A. M. et al. Visual Areas Exert Feedforward and Feedback Influences through Distinct Frequency Channels. *Neuron* **85**, 390–401 (2015).
66. Michalareas, G. et al. Alpha-Beta and Gamma Rhythms Subserve Feedback and Feedforward Influences among Human Visual Cortical Areas. *Neuron* **89**, 384–397 (2016).
67. van Kerkoerle, T. et al. Alpha and gamma oscillations characterize feedback and feedforward processing in monkey visual cortex. *Proc. Natl. Acad. Sci. U. S. A.* **111**, 14332–14341 (2014).
68. Fontolan, L., Morillon, B., Liegeois-Chauvel, C. & Giraud, A.-L. The contribution of frequency-specific activity to hierarchical information processing in the human auditory cortex. *Nat. Commun.* **5**, (2014).

69. Gould, I. C., Rushworth, M. F. & Nobre, A. C. Indexing the graded allocation of visuospatial attention using anticipatory alpha oscillations. *J. Neurophysiol.* **105**, 1318–1326 (2011).
70. Brandt, M. E. & Jansen, B. H. The relationship between prestimulus-alpha amplitude and visual evoked potential amplitude. *Int. J. Neurosci.* **61**, 261–268 (1991).
71. Başar, E., Gönder, A. & Ungan, P. Comparative frequency analysis of single EEG-evoked potential records. in *Evoked Potentials* (ed. Barber, C.) 123–129 (Springer Netherlands, 1980). doi:10.1007/978-94-011-6645-4\_11
72. Jensen, O. & Mazaheri, A. Shaping Functional Architecture by Oscillatory Alpha Activity: Gating by Inhibition. *Front. Hum. Neurosci.* **4**, (2010).
73. Samaha, J., Gosses, O. & Postle, B. R. Distinct Oscillatory Frequencies Underlie Excitability of Human Occipital and Parietal Cortex. *J. Neurosci.* **37**, 2824–2833 (2017).
74. Mo, J., Schroeder, C. E. & Ding, M. Attentional Modulation of Alpha Oscillations in Macaque Inferotemporal Cortex. *J. Neurosci.* **31**, 878–882 (2011).
75. Koch, C. & Poggio, T. Predicting the visual world: silence is golden. *Nat. Neurosci.* **2**, 9–10 (1999).
76. Clark, A. Whatever next? Predictive brains, situated agents, and the future of cognitive science. *Behav. Brain Sci.* **36**, 181–204 (2013).
77. Summerfield, C., Monti, J. M. P., Trittschuh, E. H., Mesulam, M.-M. & Egner, T. Neural repetition suppression reflects fulfilled perceptual expectations. *Nat. Neurosci.* **11**, 1004–1006 (2008).
78. Murray, S. O., Kersten, D., Olshausen, B. A., Schrater, P. & Woods, D. L. Shape perception reduces activity in human primary visual cortex. *Proc. Natl. Acad. Sci.* **99**, 15164–15169 (2002).
79. Alink, A., Schwiedrzik, C. M., Kohler, A., Singer, W. & Muckli, L. Stimulus Predictability Reduces Responses in Primary Visual Cortex. *J. Neurosci.* **30**, 2960–2966 (2010).
80. Shao, Z. & Burkhalter, A. Different Balance of Excitation and Inhibition in Forward and Feedback Circuits of Rat Visual Cortex. *J. Neurosci.* **16**, 7353–7365 (1996).
81. Liu, Y.-J. et al. Tracing inputs to inhibitory or excitatory neurons of mouse and cat visual cortex with a targeted rabies virus. *Curr. Biol. CB* **23**, 1746–1755 (2013).
82. Sandell, J. H. & Schiller, P. H. Effect of cooling area 18 on striate cortex cells in the squirrel monkey. *J. Neurophysiol.* **48**, 38–48 (1982).

83. Hupé, J. M. et al. Cortical feedback improves discrimination between figure and background by V1, V2 and V3 neurons. *Nature* **394**, 784–787 (1998).
84. Han, B. & VanRullen, R. Shape perception enhances perceived contrast: evidence for excitatory predictive feedback? *Sci. Rep.* **6**, (2016).
85. Morey, R. D. Confidence Intervals from Normalized Data: A correction to Cousineau (2005). *Tutor. Quant. Methods Psychol.* **4**, 61–64 (2008).

## FOOTNOTES

\*These values are quite different from the peak amplitudes in the waveform traces in Fig. 4B because the grand means reflect the average of peaks occurring at different latencies on different trials and so the amplitudes are lower.
